# Supplementary material for: Hierarchically porous MOF-based microneedles for glucose-responsive infected diabetic wound treatment
Source: Royal Society of Chemistry journal article supplement (doi:10.1039/d1qm01512e), 2022-01-01
Supplement: d1qm01512e1.pdf [file d1qm01512e1.pdf]

# Supporting Information

*for*

## **Hierarchically Porous MOF-Based Microneedles for Glucose-Responsive Infected Diabetic Wounds Treatment**

Xiao-Xi Yang,<sup>a</sup> Yan-Li Chen,<sup>b</sup> Peng-Fei Feng,<sup>a</sup> Cong-Cong Wang,<sup>a</sup> Xiang-Kai Li,<sup>b</sup> Liang-Liang Liu,<sup>\*a</sup> and Yu Tang<sup>\*a</sup>

<sup>a</sup> Key Laboratory of Nonferrous Metal Chemistry and Resources Utilization of Gansu Province, College of Chemistry and Chemical Engineering, Lanzhou University, Lanzhou 730000, P.R. China. Email: tangyu@lzu.edu.cn; liull@lzu.edu.cn.

<sup>b</sup> Ministry of Education Key Laboratory of Cell Activities and Stress Adaptations, School of Life Sciences, Lanzhou University, Lanzhou 730000, P. R. China.

### **Contents**

#### **1. Supporting Tables**

#### **2. Supporting Figures**

#### **3. Supporting References**

## 1. Supporting Tables

**Table S1** Data of BET surface areas and the ratios of micropore volumes to total pore volumes of different samples. GOx@ZIF and GOx@Fe-ZIF were treated with the same concentration of TA for the same reaction time to produce GOx@ZIF@Fe-TA and GOx@Fe-ZIF-TA.

| Samples                             | $S_{\text{BET}}/\text{m}^2\text{ g}^{-1}$ | $V_{\text{micro}}/V_{\text{Total}}$ |
|-------------------------------------|-------------------------------------------|-------------------------------------|
| GOx@ZIF<br>(Before TA etching)      | 1018.9                                    | 98.1%                               |
| GOx@Fe-ZIF<br>(Before TA etching)   | 1196.6                                    | 93.8%                               |
| GOx@ZIF@Fe-TA<br>(After TA etching) | 802.4                                     | 69.1%                               |
| GOx@Fe-ZIF-TA<br>(After TA etching) | 707.7                                     | 57.4%                               |

**Table S2** Data of BET surface areas and the ratios of micropore volumes to total pore volumes of GOx@Fe-ZIF doped with different contents of Fe. When Fe content is higher than 3%, the ratio decreases dramatically, revealing the higher content Fe would be bad for the growth of ZIF.

| Samples                  | $S_{\text{BET}}/ \text{m}^2 \text{g}^{-1}$ | $V_{\text{micro}}/V_{\text{Total}}$ |
|--------------------------|--------------------------------------------|-------------------------------------|
| GOx@ZIF                  | 1018.9                                     | 98.1%                               |
| GOx@Fe-ZIF<br>Fe:Zn=2:98 | 1114.4                                     | 95.7%                               |
| GOx@Fe-ZIF<br>Fe:Zn=3:97 | 1196.6                                     | 93.8%                               |
| GOx@Fe-ZIF<br>Fe:Zn=4:96 | 1184.8                                     | 80.5%                               |
| GOx@Fe-ZIF<br>Fe:Zn=6:94 | 1199.4                                     | 60.4%                               |
| GOx@Fe-ZIF<br>Fe:Zn=8:92 | 1112.4                                     | 62.2%                               |

## 2. Supporting Figures

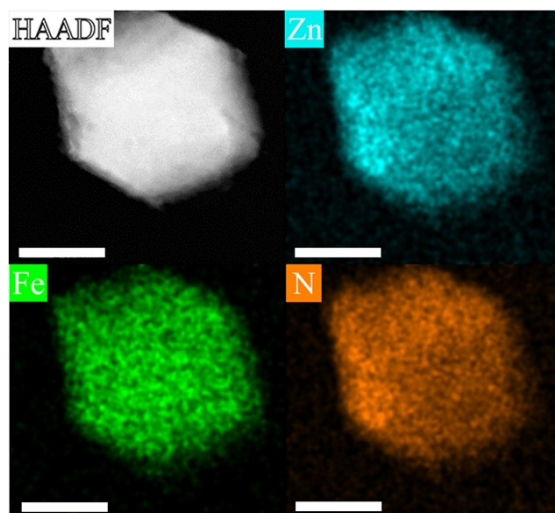

**Figure S1** Elemental mapping images of GOx@Fe-ZIF (scale bar: 300 nm).

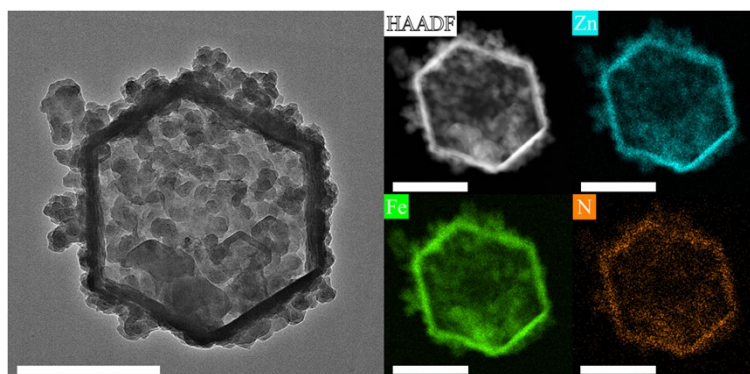

**Figure S2** TEM and elemental mapping images of GOx@Fe-ZIF-TA with longer etching time. Obvious shell could be observed (scale bar: 500 nm).

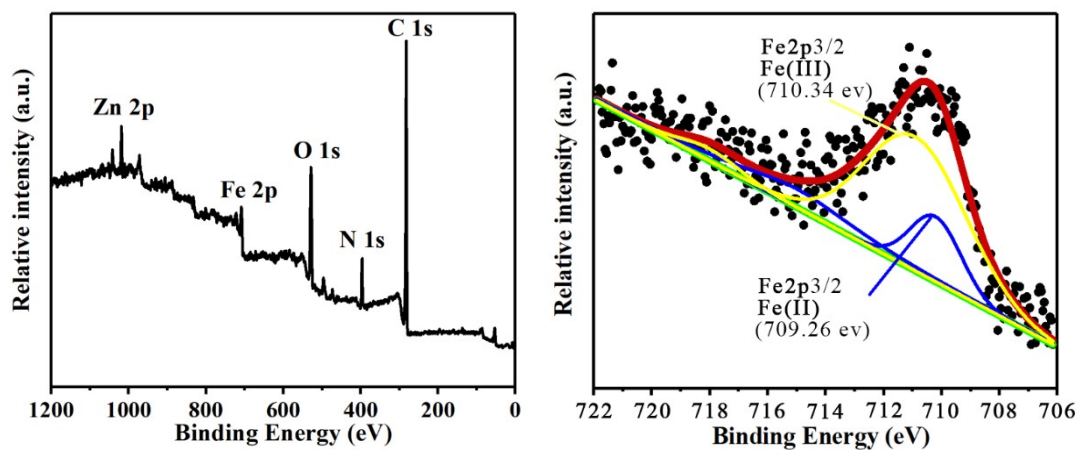

**Figure S3** XPS pattern of GOx@Fe-ZIF-TA and high-resolution XPS spectrum of Fe in GOx@Fe-ZIF-TA, revealing that most of Fe in the system exist as Fe(III) before consuming glucose.<sup>1</sup> However, TA could convert Fe(III) to highly active Fe(II) in our system.

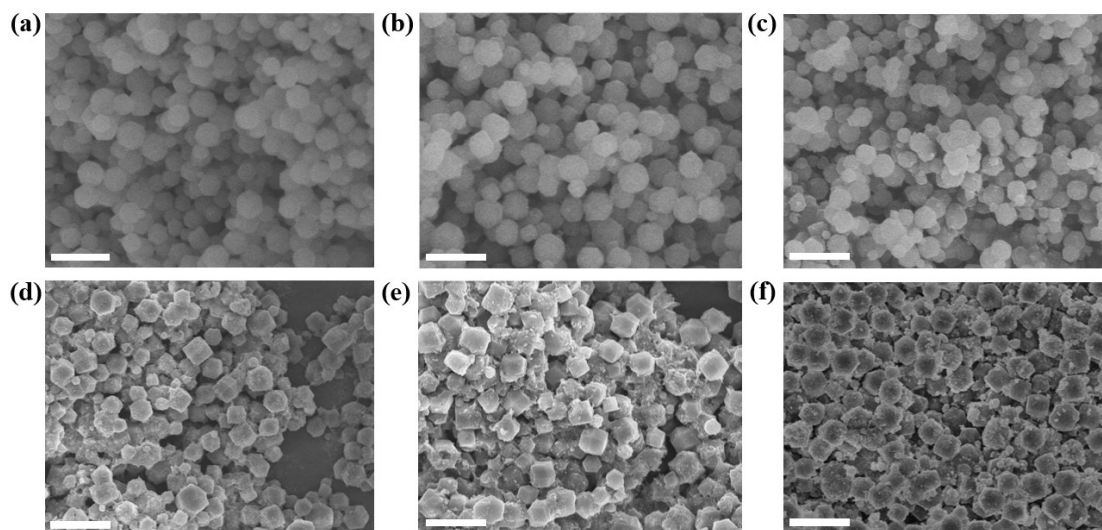

**Figure S4** SEM images of GOx@Fe-ZIF doped with different contents of Fe. The molar ratio of Fe:Zn equals to 0:100 for (a), 2:98 for (b), 4:96 for (c), 6:94 for (d), 8:92 for (e), and 10:90 for (f), respectively. When Fe content is higher than 4%, more and more impurities emerged and the dodecahedral structure of MOF became less and less obvious, indicating that the excess Fe would have a bad influence on the growth of ZIF crystals. (scale bar: 1000 nm)

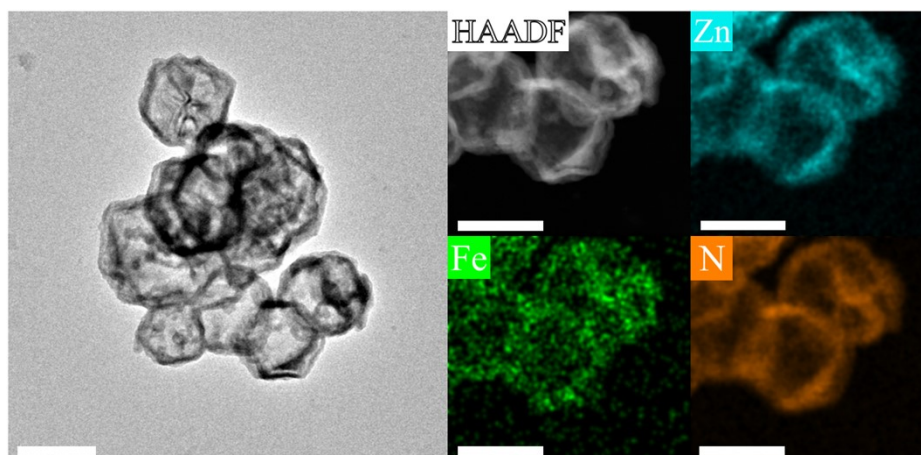

**Figure S5** TEM and elemental mapping images of GOx@ZIF@Fe-TA synthesized with the previous reported strategy.<sup>2</sup>(scale bar: 500 nm)



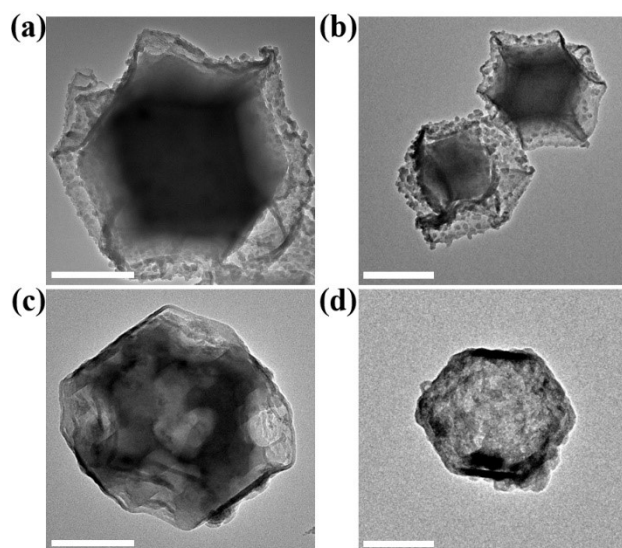

**Figure S6** TEM images of GOx@ZIF@Fe-TA and GOx@Fe-ZIF-TA at different time intervals during the etching process with the same concentration of TA. (a) TEM image of GOx@ZIF@Fe-TA at 1 min. (b) TEM image of GOx@ZIF@Fe-TA at 2 min. (c) TEM image of GOx@Fe-ZIF-TA at 1 min. (d) TEM image of GOx@Fe-ZIF-TA at 2 min. (scale bar: 200 nm)

### 3. Supporting References

1. Q. Ouyang, F. Kou, P. E. Tsang, J. Lian, J. Xian, J. Fang and Z. Fang, Green synthesis of Fe-based material using tea polyphenols and its application as a heterogeneous Fenton-like catalyst for the degradation of lincomycin, *J. Clean. Prod.*, 2019, **232**, 1492-1498.
2. L. Zhang, S. S. Wan, C. X. Li, L. Xu, H. Cheng and X. Z. Zhang, An adenosine triphosphate-responsive autocatalytic Fenton nanoparticle for tumor ablation with self-supplied H<sub>2</sub>O<sub>2</sub> and acceleration of Fe(III)/Fe(II) conversion, *Nano Lett.*, 2018, **18**, 7609-7618.
